# Supplementary material for: Changes in heart failure management and long-term mortality over 10 years: observational study
Source: HighWire-hosted journal article supplement (doi:10.1136/openhrt-2021-001888), 2022-03-01
Supplement: openhrt-2021-001888supp001_data_supplement.pdf [file openhrt-2021-001888supp001_data_supplement.pdf]

## Appendix

### Patient characteristics

As well as age and sex, we reported: body mass index (BMI) in kilos per square metre, systolic blood pressure in mmHg and electronic frailty index (eFI) based on polypharmacy in the previous 1 year and other deficits over the previous 5 years (see Clegg et al for codes – reference is below); population-weighted twentile of small area level socio-economic status (Index of Multiple Deprivation, IMD 2010); cigarette smoking category (lifelong non-smoker, ex-smoker, <10 cigarettes/day, 10-19 cigarettes/day, or 20+ cigarettes/day); diabetes status (none, Type I or Type II); ethnicity from HES (white, non-white or unknown); and a list of binary predictors. The binary factors were defined either using CPRD records in the previous 5 years, using CPRD records in the previous 1 year (before the diagnosis date), using HES records in the previous 1 year, or using combined CPRD and HES records in the previous 5 years. The CPRD binary predictors measured over the previous 5 years were: co-morbidities (atrial fibrillation, arrhythmia other than atrial fibrillation, hypertension, renal diseases, myocarditis, acute myocardial infarction, congenital heart disease, coronary heart disease, chronic pulmonary disease, stroke, peripheral vascular disease); widowed or bereaved; recorded HF symptom presences (breathlessness/shortness of breath/shortness of breath on exertion), fatigue, ankle swelling). The CPRD binary factors measured over the previous year were: appointment type presences (4+ minute GP appointment, 4+ minute practice nurse appointment, home visit appointment, out of hours appointment, GP reported non-attendance, practice nurse reported non-attendance); CPRD-recorded Emergency Room visit; CPRD-recorded clinic appointment; CPRD-recorded prescriptions for a list of classes of drugs. These classes of drugs were: beta blockers, thiazide-related diuretics, loop diuretics, aldosterone antagonists, renin-angiotensin system (RAS) drugs, glucocorticoid therapy, and atypical antipsychotics. The HES binary predictors (presence indicators over the previous 1 year) were: four procedures (coronary artery bypass graft, percutaneous coronary intervention, pacemaker, implantable cardioverter defibrillators); any hospital dialysis; elective bed admission without HF primary diagnosis; emergency non-HF bed admission (one day only); emergency non-HF bed admission (at least one night); and any hospital admissions with primary diagnosis in AHRQ's Clinical Classification Software (CCS) categories (086 Cataract, 122 Pneumonia (except that caused by tuberculosis or sexually transmitted disease), 127 COPD and bronchiectasis, 134 Other upper respiratory disease). The CCS system was devised by the US Agency for Healthcare Research and Quality as a general-purpose way of grouping ICD10 codes into homogeneous groups. Elective or emergency admission was defined using the "method of admission" field in HES (11-13 for elective, 21-28 for emergency). The binary indicator derived from combined CPRD and HES data in the previous 5 years was living alone.

Read codes for the primary care variables were taken from our previous work (Bottle A, Kim D, Aylin P, Cowie MR, Majeed A, Hayhoe B. Routes to diagnosis of heart failure: observational study using linked data in England. *Heart*. 2018 Apr;104(7):600-605. doi: 10.1136/heartjnl-2017-312183).

Reference for the eFI:

Clegg A, Bates C, Young J, Ryan R, Nichols L, Teale EA, Mohammed MA, Parry J, Marshall T. Development and validation of an electronic frailty index using routine primary

care electronic health record data. *Age Ageing* 2016; 45(3): 353–360.  
<https://doi.org/10.1093/ageing/afw039>

**Details of medications (BNF = British National Formulary)**

Beta blockers (BNF Chapter 2.4); Thiazide-related diuretics (BNF Chapter 2.2.1); Loop diuretics (BNF Chapter 2.2.2); Aldosterone antagonists (spironolactone or eplerenone); Renin-angiotensin system (RAS) drugs (BNF Chapter 2.5.5); Glucocorticoid therapy (BNF Chapter 6.3.2); Atypical antipsychotics (BNF Chapter 4.2.1.2 and/or any of 10 individual drug names).

**Table A1. Medications at 12 months after diagnosis**

|                                      | 2001/2 cohort<br>n, % at dx | 2001/2 cohort<br>n, % 12 months<br>since dx | 2011/12 cohort<br>n, % at dx | 2011/12 cohort<br>n, % 12 months<br>since dx |
|--------------------------------------|-----------------------------|---------------------------------------------|------------------------------|----------------------------------------------|
| Beta blockers                        | 1453, 24.3%                 | 1441, 24.1%                                 | 5013, 39.1%                  | 6521, 50.8%                                  |
| Thiazide-related diuretics           | 1158, 19.4%                 | 588, 9.8%                                   | 2434, 19.0%                  | 983, 7.7%                                    |
| Loop diuretics                       | 2349, 39.3%                 | 3676, 61.5%                                 | 5504, 42.9%                  | 7175, 55.9%                                  |
| Aldosterone antagonists              | 186, 3.1%                   | 775, 13.0%                                  | 709, 5.5%                    | 2291, 17.9%                                  |
| Renin-angiotensin system (RAS) drugs | 1903, 31.8%                 | 3272, 54.7%                                 | 6967, 54.3%                  | 7552, 58.9%                                  |
| Glucocorticoid therapy               | 870, 14.5%                  | 695, 11.6%                                  | 2464, 19.2%                  | 1791, 14.0%                                  |
| Atypical antipsychotics              | 59, 1.0%                    | 74, 1.2%                                    | 146, 1.1%                    | 141, 1.1%                                    |

Table A2.1. Quantitative patient characteristics at time of first recorded HF diagnosis in each cohort, GP-diagnosed

| Quantitative variable                         | 2001/2 cohort |       |      | 2011/12 cohort |       |      |
|-----------------------------------------------|---------------|-------|------|----------------|-------|------|
|                                               | N present     | Mean  | SD   | N present      | Mean  | SD   |
| Attained age in diagnosis year                | 3027          | 76.9  | 10.5 | 3955           | 75.2  | 12.1 |
| Number of comorbidities                       | 3027          | 1.6   | 1.3  | 3955           | 2.4   | 1.6  |
| Electronic frailty index (eFI)                | 3027          | 0.2   | 0.1  | 3955           | 0.2   | 0.1  |
| BMI (kilos/square metre)                      | 1555          | 27.7  | 5.8  | 3281           | 28.5  | 6.3  |
| Systolic blood pressure (mm Hg)               | 2709          | 145.5 | 22.5 | 3900           | 133.6 | 18.9 |
| Diastolic blood pressure (mm Hg)              | 2709          | 80.2  | 11.5 | 3900           | 75.6  | 11.2 |
| Serum cholesterol (mmol/L)                    | 1225          | 5.3   | 1.1  | 3513           | 4.6   | 1.2  |
| HDL cholesterol (mmol/L)                      | 582           | 1.4   | 0.4  | 3169           | 1.4   | 0.4  |
| LDL cholesterol (mmol/L)                      | 404           | 3.1   | 1.0  | 2727           | 2.6   | 1.0  |
| HDL/LDL cholesterol ratio                     | 240           | 4.0   | 1.4  | 2856           | 3.5   | 1.2  |
| Blood glucose (mmol/L)                        | 1281          | 7.1   | 3.5  | 2946           | 6.2   | 2.5  |
| Serum creatinine (umol/L)                     | 1817          | 106.2 | 39.5 | 3817           | 96.2  | 38.9 |
| Serum triglycerides (mmol/L)                  | 729           | 1.7   | 1.1  | 2906           | 1.4   | 1.1  |
| Blood urea (mmol/L)                           | 1361          | 7.6   | 4.9  | 3247           | 7.4   | 3.5  |
| Estimated glomerular filtration rate (mL/min) | 31            | 62.0  | 12.4 | 2513           | 64.6  | 18.8 |
| Haemoglobin (g/dL)                            | 1629          | 13.2  | 1.8  | 3702           | 13.2  | 1.8  |

Table A2.2. Categorical patient characteristics at HF diagnosis in each cohort, GP-diagnosed

| Factor level                             | 2001/2 cohort |         | 2011/12 cohort |         |
|------------------------------------------|---------------|---------|----------------|---------|
|                                          | Frequency     | Percent | Frequency      | Percent |
| All patients:                            |               |         |                |         |
| Total                                    | 3027          | 100     | 3955           | 100     |
| Gender:                                  |               |         |                |         |
| Male                                     | 1505          | 49.7    | 2253           | 57.0    |
| Female                                   | 1522          | 50.3    | 1702           | 43.0    |
| Age group in diagnosis year:             |               |         |                |         |
| <45                                      | 21            | 0.7     | 68             | 1.7     |
| 45-64                                    | 345           | 11.4    | 649            | 16.4    |
| 65-74                                    | 693           | 22.9    | 921            | 23.3    |
| 75-84                                    | 1253          | 41.4    | 1393           | 35.2    |
| 85+                                      | 715           | 23.6    | 924            | 23.4    |
| IMD 2010 quintile:                       |               |         |                |         |
| 1 (least deprived)                       | 509           | 16.8    | 789            | 19.9    |
| 2                                        | 715           | 23.6    | 945            | 23.9    |
| 3                                        | 670           | 22.1    | 882            | 22.3    |
| 4                                        | 598           | 19.8    | 726            | 18.4    |
| 5 (most deprived)                        | 528           | 17.4    | 612            | 15.5    |
| Unknown                                  | 7             | 0.2     | 1              | 0.0     |
| HES ethnicity (white or non-white):      |               |         |                |         |
| White                                    | 2491          | 82.3    | 3765           | 95.2    |
| Non-white                                | 56            | 1.9     | 102            | 2.6     |
| Unknown                                  | 480           | 15.9    | 88             | 2.2     |
| Number of comorbidities (group):         |               |         |                |         |
| 0                                        | 649           | 21.4    | 420            | 10.6    |
| 1                                        | 985           | 32.5    | 813            | 20.6    |
| 2                                        | 727           | 24.0    | 965            | 24.4    |
| 3                                        | 412           | 13.6    | 819            | 20.7    |
| 4+                                       | 254           | 8.4     | 938            | 23.7    |
| Electronic frailty index (eFI) category: |               |         |                |         |
| Fit                                      | 551           | 18.2    | 428            | 10.8    |
| Mild frailty                             | 1693          | 55.9    | 1846           | 46.7    |
| Moderate frailty                         | 695           | 23.0    | 1367           | 34.6    |
| Severe frailty                           | 88            | 2.9     | 314            | 7.9     |
| Smoking category (non, ex or current):   |               |         |                |         |
| Non-smoker                               | 344           | 11.4    | 1562           | 39.5    |
| Ex-smoker                                | 233           | 7.7     | 1573           | 39.8    |
| Current smoker                           | 985           | 32.5    | 613            | 15.5    |

|                                |      |      |      |      |
|--------------------------------|------|------|------|------|
| Unknown                        | 1465 | 48.4 | 207  | 5.2  |
| Alcohol drinking group:        |      |      |      |      |
| Non drinker                    | 109  | 3.6  | 683  | 17.3 |
| Light, moderate or unspecified | 945  | 31.2 | 1646 | 41.6 |
| Heavy or alcoholic             | 129  | 4.3  | 261  | 6.6  |
| Unknown                        | 1844 | 60.9 | 1365 | 34.5 |
| BMI group:                     |      |      |      |      |
| Underweight                    | 49   | 1.6  | 89   | 2.3  |
| Normal                         | 468  | 15.5 | 909  | 23.0 |
| Overweight                     | 592  | 19.6 | 1181 | 29.9 |
| Obese                          | 460  | 15.2 | 1116 | 28.2 |
| Unknown                        | 1458 | 48.2 | 660  | 16.7 |
| Diabetes status:               |      |      |      |      |
| No diabetes                    | 2581 | 85.3 | 3165 | 80.0 |
| Type 1 diabetes                | 183  | 6.0  | 182  | 4.6  |
| Type 2 diabetes                | 263  | 8.7  | 608  | 15.4 |

Table A2.3. Binary patient characteristics at HF diagnosis in each cohort, GP-diagnosed

| Factor level                                             | 2001/2 cohort |           |         | 2011/12 cohort |           |         |
|----------------------------------------------------------|---------------|-----------|---------|----------------|-----------|---------|
|                                                          | N present     | Frequency | Percent | N present      | Frequency | Percent |
| HF symptoms up to diagnosis:                             |               |           |         |                |           |         |
| Presence of: Any heart failure symptom                   | 3027          | 1566      | 51.7    | 3955           | 2325      | 58.8    |
| Presence of: Breathlessness/SOB/SOBE                     | 3027          | 1208      | 39.9    | 3955           | 1935      | 48.9    |
| Presence of: Fatigue                                     | 3027          | 362       | 12.0    | 3955           | 547       | 13.8    |
| Presence of: Ankle swelling                              | 3027          | 338       | 11.2    | 3955           | 542       | 13.7    |
| First-symptom presence of: Breathlessness/SOB/SOBE       | 3027          | 1030      | 34.0    | 3955           | 1631      | 41.2    |
| First-symptom presence of: Fatigue                       | 3027          | 283       | 9.3     | 3955           | 386       | 9.8     |
| First-symptom presence of: Ankle swelling                | 3027          | 259       | 8.6     | 3955           | 347       | 8.8     |
| Physiological indicators:                                |               |           |         |                |           |         |
| eGFR below 60mL/min                                      | 31            | 15        | 48.4    | 2513           | 932       | 37.1    |
| Social vulnerability indicators:                         |               |           |         |                |           |         |
| Living alone                                             | 3027          | 101       | 3.3     | 3955           | 206       | 5.2     |
| Widowed or bereaved                                      | 3027          | 216       | 7.1     | 3955           | 229       | 5.8     |
| Comorbidity components:                                  |               |           |         |                |           |         |
| Comorbidity: 1 Atrial fibrillation                       | 3027          | 619       | 20.4    | 3955           | 1320      | 33.4    |
| Comorbidity: 2 Arrhythmia other than atrial fibrillation | 3027          | 259       | 8.6     | 3955           | 632       | 16.0    |
| Comorbidity: 3 Diabetes                                  | 3027          | 445       | 14.7    | 3955           | 788       | 19.9    |
| Comorbidity: 4 Hypertension                              | 3027          | 1229      | 40.6    | 3955           | 2435      | 61.6    |
| Comorbidity: 5 Renal diseases                            | 3027          | 89        | 2.9     | 3955           | 994       | 25.1    |
| Comorbidity: 6 Myocarditis                               | 3027          | 38        | 1.3     | 3955           | 126       | 3.2     |
| Comorbidity: 7 Acute myocardial infarction               | 3027          | 318       | 10.5    | 3955           | 511       | 12.9    |
| Comorbidity: 8 Congenital heart disease                  | 3027          | 7         | 0.2     | 3955           | 30        | 0.8     |
| Comorbidity: 9 Coronary heart disease                    | 3027          | 826       | 27.3    | 3955           | 1299      | 32.8    |
| Comorbidity: 10 Chronic pulmonary disease                | 3027          | 539       | 17.8    | 3955           | 809       | 20.5    |

|                                                      |      |      |      |      |      |      |
|------------------------------------------------------|------|------|------|------|------|------|
| Comorbidity: 11 Stroke                               | 3027 | 202  | 6.7  | 3955 | 284  | 7.2  |
| Comorbidity: 12 Peripheral vascular disease          | 3027 | 221  | 7.3  | 3955 | 317  | 8.0  |
| Baseline NHS contacts in previous year:              |      |      |      |      |      |      |
| CABG                                                 | 3027 | 18   | 0.6  | 3955 | 44   | 1.1  |
| PTCA                                                 | 3027 | 21   | 0.7  | 3955 | 184  | 4.7  |
| Pacemaker                                            | 3027 | 24   | 0.8  | 3955 | 81   | 2.0  |
| ICD                                                  | 3027 | 0    | 0.0  | 3955 | 7    | 0.2  |
| Any hospital dialysis                                | 3027 | 6    | 0.2  | 3955 | 15   | 0.4  |
| Any hospital bed admission                           | 3027 | 1194 | 39.4 | 3955 | 2011 | 50.8 |
| Elective bed admission without HF primary diagnosis  | 3027 | 613  | 20.3 | 3955 | 1065 | 26.9 |
| Emergency bed admission without HF primary diagnosis | 3027 | 832  | 27.5 | 3955 | 1412 | 35.7 |
| Emergency non-HF bed admission (one day only)        | 3027 | 71   | 2.3  | 3955 | 284  | 7.2  |
| Emergency non-HF bed admission (at least one night)  | 3027 | 794  | 26.2 | 3955 | 1266 | 32.0 |
| A&E visit ending in admission                        | 3027 | 0    | 0.0  | 3955 | 1061 | 26.8 |
| A&E visit not ending in admission                    | 3027 | 0    | 0.0  | 3955 | 847  | 21.4 |
| OPD appointment attended                             | 3027 | 0    | 0.0  | 3955 | 2980 | 75.3 |
| OPD appointment not attended                         | 3027 | 0    | 0.0  | 3955 | 1185 | 30.0 |
| OPD appointment for cardiology                       | 3027 | 0    | 0.0  | 3955 | 1348 | 34.1 |
| OPD appointment specialty                            | 3027 | 0    | 0.0  | 3955 | 3025 | 76.5 |
| 4+ minute GP appointment                             | 3027 | 2473 | 81.7 | 3955 | 3830 | 96.8 |
| 4+ minute practice nurse appointment                 | 3027 | 1423 | 47.0 | 3955 | 3024 | 76.5 |
| Home visit appointment                               | 3027 | 1025 | 33.9 | 3955 | 944  | 23.9 |
| Out of hours appointment                             | 3027 | 384  | 12.7 | 3955 | 574  | 14.5 |
| GP reported non-attendance                           | 3027 | 113  | 3.7  | 3955 | 186  | 4.7  |
| Practice nurse reported non-attendance               | 3027 | 53   | 1.8  | 3955 | 159  | 4.0  |
| CPRD recorded A&E visit                              | 3027 | 136  | 4.5  | 3955 | 915  | 23.1 |
| CPRD recorded OPD appointment                        | 3027 | 747  | 24.7 | 3955 | 2577 | 65.2 |
| Heart failure review                                 | 3027 | 0    | 0.0  | 3955 | 2    | 0.1  |
| Beta blockers (BNF Chapter 2.4)                      | 3027 | 754  | 24.9 | 3955 | 1790 | 45.3 |



|                                                             |      |      |      |      |      |      |
|-------------------------------------------------------------|------|------|------|------|------|------|
| Thiazide-related diuretics (BNF Chapter 2.2.1)              | 3027 | 617  | 20.4 | 3955 | 731  | 18.5 |
| Loop diuretics (BNF Chapter 2.2.2)                          | 3027 | 1273 | 42.1 | 3955 | 1695 | 42.9 |
| Aldosterone antagonists (spironolactone or eplerenone)      | 3027 | 87   | 2.9  | 3955 | 219  | 5.5  |
| Renin-angiotensin system (RAS) drugs (BNF Chapter 2.5.5)    | 3027 | 1060 | 35.0 | 3955 | 2281 | 57.7 |
| Glucocorticoid therapy (BNF Chapter 6.3.2)                  | 3027 | 430  | 14.2 | 3955 | 695  | 17.6 |
| Atypical antipsychotics (BNF Chapter 4.2.1.2 or drug names) | 3027 | 26   | 0.9  | 3955 | 28   | 0.7  |

Table A3.1. Quantitative patient characteristics at time of first recorded HF diagnosis in each cohort, hospital-diagnosed

| Quantitative variable                         | 2001/2 cohort |       |      | 2011/12 cohort |       |      |
|-----------------------------------------------|---------------|-------|------|----------------|-------|------|
|                                               | N present     | Mean  | SD   | N present      | Mean  | SD   |
| Attained age in diagnosis year                | 2954          | 76.9  | 11.4 | 8875           | 78.6  | 11.9 |
| Number of comorbidities                       | 2954          | 2.2   | 1.4  | 8875           | 3.2   | 1.6  |
| Electronic frailty index (eFI)                | 2954          | 0.2   | 0.1  | 8875           | 0.2   | 0.1  |
| BMI (kilos/square metre)                      | 1359          | 27.2  | 5.6  | 6938           | 27.9  | 6.6  |
| Systolic blood pressure (mm Hg)               | 2553          | 145.2 | 23.1 | 8690           | 133.7 | 19.5 |
| Diastolic blood pressure (mm Hg)              | 2553          | 79.9  | 11.9 | 8690           | 74.4  | 11.5 |
| Serum cholesterol (mmol/L)                    | 1053          | 5.2   | 1.3  | 7505           | 4.6   | 1.2  |
| HDL cholesterol (mmol/L)                      | 491           | 1.3   | 0.4  | 6662           | 1.4   | 0.5  |
| LDL cholesterol (mmol/L)                      | 347           | 3.1   | 1.1  | 5736           | 2.5   | 1.0  |
| HDL/LDL cholesterol ratio                     | 215           | 4.1   | 1.6  | 5962           | 3.5   | 1.3  |
| Blood glucose (mmol/L)                        | 1156          | 7.6   | 4.2  | 6594           | 6.6   | 3.1  |
| Serum creatinine (umol/L)                     | 1663          | 110.6 | 46.4 | 8467           | 104.5 | 55.3 |
| Serum triglycerides (mmol/L)                  | 642           | 1.9   | 1.3  | 6190           | 1.5   | 0.9  |
| Blood urea (mmol/L)                           | 1168          | 8.0   | 5.2  | 7378           | 8.3   | 4.9  |
| Estimated glomerular filtration rate (mL/min) | 25            | 61.4  | 15.9 | 5492           | 60.3  | 21.0 |
| Haemoglobin (g/dL)                            | 1522          | 13.0  | 2.1  | 8201           | 12.7  | 2.0  |

Table A3.2. Categorical patient characteristics at HF diagnosis in each cohort, hospital-diagnosed

| Factor level                             | 2001/2 cohort |         | 2011/12 cohort |         |
|------------------------------------------|---------------|---------|----------------|---------|
|                                          | Frequency     | Percent | Frequency      | Percent |
| All patients:                            |               |         |                |         |
| Total                                    | 2954          | 100     | 8875           | 100     |
| Patient Gender:                          |               |         |                |         |
| Male                                     | 1454          | 49.2    | 4370           | 49.2    |
| Female                                   | 1500          | 50.8    | 4505           | 50.8    |
| Age group in diagnosis year:             |               |         |                |         |
| <45                                      | 36            | 1.2     | 94             | 1.1     |
| 45-64                                    | 371           | 12.6    | 1035           | 11.7    |
| 65-74                                    | 631           | 21.4    | 1566           | 17.6    |
| 75-84                                    | 1130          | 38.3    | 2964           | 33.4    |
| 85+                                      | 786           | 26.6    | 3216           | 36.2    |
| IMD 2010 quintile:                       |               |         |                |         |
| 1 (least deprived)                       | 458           | 15.5    | 1682           | 19.0    |
| 2                                        | 684           | 23.2    | 2081           | 23.4    |
| 3                                        | 582           | 19.7    | 1829           | 20.6    |
| 4                                        | 616           | 20.9    | 1787           | 20.1    |
| 5 (most deprived)                        | 602           | 20.4    | 1489           | 16.8    |
| Unknown                                  | 12            | 0.4     | 7              | 0.1     |
| HES ethnicity (white or non-white):      |               |         |                |         |
| White                                    | 2546          | 86.2    | 8486           | 95.6    |
| Non-white                                | 49            | 1.7     | 290            | 3.3     |
| Unknown                                  | 359           | 12.2    | 99             | 1.1     |
| Number of comorbidities (group):         |               |         |                |         |
| 0                                        | 255           | 8.6     | 257            | 2.9     |
| 1                                        | 704           | 23.8    | 1009           | 11.4    |
| 2                                        | 833           | 28.2    | 1964           | 22.1    |
| 3                                        | 634           | 21.5    | 2146           | 24.2    |
| 4+                                       | 528           | 17.9    | 3499           | 39.4    |
| Electronic frailty index (eFI) category: |               |         |                |         |
| Fit                                      | 1046          | 35.4    | 1327           | 15.0    |
| Mild frailty                             | 1416          | 47.9    | 3991           | 45.0    |
| Moderate frailty                         | 432           | 14.6    | 2929           | 33.0    |
| Severe frailty                           | 60            | 2.0     | 628            | 7.1     |
| Smoking category (non, ex or current):   |               |         |                |         |
| Non-smoker                               | 282           | 9.5     | 3511           | 39.6    |
| Ex-smoker                                | 189           | 6.4     | 3257           | 36.7    |
| Current smoker                           | 908           | 30.7    | 1492           | 16.8    |

|                                |      |      |      |      |
|--------------------------------|------|------|------|------|
| Unknown                        | 1575 | 53.3 | 615  | 6.9  |
| Alcohol drinking group:        |      |      |      |      |
| Non drinker                    | 123  | 4.2  | 1762 | 19.9 |
| Light, moderate or unspecified | 730  | 24.7 | 3057 | 34.4 |
| Heavy or alcoholic             | 108  | 3.7  | 469  | 5.3  |
| Unknown                        | 1993 | 67.5 | 3587 | 40.4 |
| BMI group:                     |      |      |      |      |
| Underweight                    | 46   | 1.6  | 265  | 3.0  |
| Normal                         | 442  | 15.0 | 2228 | 25.1 |
| Overweight                     | 508  | 17.2 | 2259 | 25.5 |
| Obese                          | 376  | 12.7 | 2218 | 25.0 |
| Unknown                        | 1582 | 53.6 | 1905 | 21.5 |
| Diabetes status:               |      |      |      |      |
| No diabetes                    | 2418 | 81.9 | 6640 | 74.8 |
| Type 1 diabetes                | 195  | 6.6  | 550  | 6.2  |
| Type 2 diabetes                | 341  | 11.5 | 1685 | 19.0 |

Table A3.3. Binary patient characteristics at HF diagnosis in each cohort, hospital-diagnosed

| Factor level                                             | 2001/2 cohort |           |         | 2011/12 cohort |           |         |
|----------------------------------------------------------|---------------|-----------|---------|----------------|-----------|---------|
|                                                          | N             | Frequency | Percent | N              | Frequency | Percent |
| HF symptoms up to diagnosis:                             |               |           |         |                |           |         |
| Presence of: Any heart failure symptom                   | 2954          | 1224      | 41.4    | 8875           | 4848      | 54.6    |
| Presence of: Breathlessness/SOB/SOBE                     | 2954          | 953       | 32.3    | 8875           | 3874      | 43.7    |
| Presence of: Fatigue                                     | 2954          | 267       | 9.0     | 8875           | 1138      | 12.8    |
| Presence of: Ankle swelling                              | 2954          | 246       | 8.3     | 8875           | 1174      | 13.2    |
| First-symptom presence of: Breathlessness/SOB/SOBE       | 2954          | 830       | 28.1    | 8875           | 3303      | 37.2    |
| First-symptom presence of: Fatigue                       | 2954          | 215       | 7.3     | 8875           | 814       | 9.2     |
| First-symptom presence of: Ankle swelling                | 2954          | 181       | 6.1     | 8875           | 780       | 8.8     |
| Physiological indicators:                                |               |           |         |                |           |         |
| eGFR below 60mL/min                                      | 25            | 8         | 32.0    | 5492           | 2537      | 46.2    |
| Social vulnerability indicators:                         |               |           |         |                |           |         |
| Living alone                                             | 2954          | 241       | 8.2     | 8875           | 1013      | 11.4    |
| Widowed or bereaved                                      | 2954          | 160       | 5.4     | 8875           | 532       | 6.0     |
| Comorbidity components:                                  |               |           |         |                |           |         |
| Comorbidity: 1 Atrial fibrillation                       | 2954          | 914       | 30.9    | 8875           | 4077      | 45.9    |
| Comorbidity: 2 Arrhythmia other than atrial fibrillation | 2954          | 358       | 12.1    | 8875           | 1714      | 19.3    |
| Comorbidity: 3 Diabetes                                  | 2954          | 534       | 18.1    | 8875           | 2235      | 25.2    |
| Comorbidity: 4 Hypertension                              | 2954          | 1299      | 44.0    | 8875           | 6531      | 73.6    |
| Comorbidity: 5 Renal diseases                            | 2954          | 274       | 9.3     | 8875           | 3075      | 34.6    |
| Comorbidity: 6 Myocarditis                               | 2954          | 44        | 1.5     | 8875           | 203       | 2.3     |
| Comorbidity: 7 Acute myocardial infarction               | 2954          | 631       | 21.4    | 8875           | 1718      | 19.4    |
| Comorbidity: 8 Congenital heart disease                  | 2954          | 13        | 0.4     | 8875           | 67        | 0.8     |
| Comorbidity: 9 Coronary heart disease                    | 2954          | 1231      | 41.7    | 8875           | 3820      | 43.0    |
| Comorbidity: 10 Chronic pulmonary disease                | 2954          | 742       | 25.1    | 8875           | 2631      | 29.6    |

|                                                      |      |      |      |      |      |      |
|------------------------------------------------------|------|------|------|------|------|------|
| Comorbidity: 11 Stroke                               | 2954 | 256  | 8.7  | 8875 | 856  | 9.6  |
| Comorbidity: 12 Peripheral vascular disease          | 2954 | 296  | 10.0 | 8875 | 1165 | 13.1 |
| Baseline NHS contacts in previous year:              |      |      |      |      |      |      |
| CABG                                                 | 2954 | 19   | 0.6  | 8875 | 48   | 0.5  |
| PTCA                                                 | 2954 | 12   | 0.4  | 8875 | 130  | 1.5  |
| Pacemaker                                            | 2954 | 28   | 0.9  | 8875 | 124  | 1.4  |
| ICD                                                  | 2954 | 0    | 0.0  | 8875 | 9    | 0.1  |
| Any hospital dialysis                                | 2954 | 9    | 0.3  | 8875 | 83   | 0.9  |
| Any hospital bed admission                           | 2954 | 1488 | 50.4 | 8875 | 5300 | 59.7 |
| Elective bed admission without HF primary diagnosis  | 2954 | 701  | 23.7 | 8875 | 2502 | 28.2 |
| Emergency bed admission without HF primary diagnosis | 2954 | 1108 | 37.5 | 8875 | 4181 | 47.1 |
| Emergency non-HF bed admission (one day only)        | 2954 | 66   | 2.2  | 8875 | 761  | 8.6  |
| Emergency non-HF bed admission (at least one night)  | 2954 | 1079 | 36.5 | 8875 | 3907 | 44.0 |
| A&E visit ending in admission                        | 2954 | 0    | 0.0  | 8875 | 3962 | 44.6 |
| A&E visit not ending in admission                    | 2954 | 0    | 0.0  | 8875 | 2204 | 24.8 |
| OPD appointment attended                             | 2954 | 0    | 0.0  | 8875 | 6488 | 73.1 |
| OPD appointment not attended                         | 2954 | 0    | 0.0  | 8875 | 3168 | 35.7 |
| OPD appointment for cardiology                       | 2954 | 0    | 0.0  | 8875 | 2074 | 23.4 |
| OPD appointment specialty                            | 2954 | 0    | 0.0  | 8875 | 6680 | 75.3 |
| 4+ minute GP appointment                             | 2954 | 2227 | 75.4 | 8875 | 8421 | 94.9 |
| 4+ minute practice nurse appointment                 | 2954 | 1191 | 40.3 | 8875 | 6219 | 70.1 |
| Home visit appointment                               | 2954 | 1083 | 36.7 | 8875 | 3373 | 38.0 |
| Out of hours appointment                             | 2954 | 478  | 16.2 | 8875 | 1804 | 20.3 |
| GP reported non-attendance                           | 2954 | 108  | 3.7  | 8875 | 374  | 4.2  |
| Practice nurse reported non-attendance               | 2954 | 57   | 1.9  | 8875 | 380  | 4.3  |
| CPRD recorded A&E visit                              | 2954 | 212  | 7.2  | 8875 | 3055 | 34.4 |
| CPRD recorded OPD appointment                        | 2954 | 757  | 25.6 | 8875 | 5651 | 63.7 |
| Heart failure review                                 | 2954 | 0    | 0.0  | 8875 | 0    | 0.0  |

|                                                             |      |      |      |      |      |      |
|-------------------------------------------------------------|------|------|------|------|------|------|
| Beta blockers (BNF Chapter 2.4)                             | 2954 | 699  | 23.7 | 8875 | 3223 | 36.3 |
| Thiazide-related diuretics (BNF Chapter 2.2.1)              | 2954 | 541  | 18.3 | 8875 | 1703 | 19.2 |
| Loop diuretics (BNF Chapter 2.2.2)                          | 2954 | 1076 | 36.4 | 8875 | 3809 | 42.9 |
| Aldosterone antagonists (spironolactone or eplerenone)      | 2954 | 99   | 3.4  | 8875 | 490  | 5.5  |
| Renin-angiotensin system (RAS) drugs (BNF Chapter 2.5.5)    | 2954 | 843  | 28.5 | 8875 | 4686 | 52.8 |
| Glucocorticoid therapy (BNF Chapter 6.3.2)                  | 2954 | 440  | 14.9 | 8875 | 1769 | 19.9 |
| Atypical antipsychotics (BNF Chapter 4.2.1.2 or drug names) | 2954 | 33   | 1.1  | 8875 | 118  | 1.3  |
